# Supplementary material
Source: PubMed Central journal article supplement (PMC2547052)
Supplement: supp_74_18_5822__1.pdf [file supp_74_18_5822__1.pdf]

**Diversity of bacterial endosymbionts  
of environmental *Acanthamoeba* isolates**

Stephan Schmitz-Esser et al.

*Supplemental Material*

**Supplementary Table 1: Primers and oligonucleotide probes used in this study.**

| Short name                                                                  | Sequence (5'-3')        | Specificity                                                                                                          | Target site            | Annealing temperature /<br>Formamide concentration | Reference  |
|-----------------------------------------------------------------------------|-------------------------|----------------------------------------------------------------------------------------------------------------------|------------------------|----------------------------------------------------|------------|
| <b>16S and 18S rDNA targeted primers used for PCR</b>                       |                         |                                                                                                                      |                        |                                                    |            |
| 616F                                                                        | AGAGTTTGATYMTGGCTC      | most <i>Bacteria</i>                                                                                                 | 8-25 <sup>a</sup>      | 52°C                                               | (9)        |
| 1492R                                                                       | GGYTACCTTGTTACGACTT     | most <i>Bacteria</i>                                                                                                 | 1492-1510 <sup>a</sup> | 52°C                                               | (11)       |
| 16S1 <sup>c</sup>                                                           | CGGATCCTGAGAATTGATC     | <i>Chlamydiae</i>                                                                                                    | 1-18 <sup>a</sup>      | 44°C                                               | (12)       |
| 16S2 <sup>c</sup>                                                           | TGTCGACAAAGGAGGTGATCCA  | <i>Chlamydiae</i>                                                                                                    | 1528-1549 <sup>a</sup> | 44°C                                               |            |
| SSU1                                                                        | AACCTGGTTGATCCTGCCAG    | Eukarya                                                                                                              | 1-17 <sup>b</sup>      | 48°C                                               | (6)        |
| SSU2                                                                        | GATCCTTCTGCAGTTCACCTAT  | Eukarya                                                                                                              | 2273-2295 <sup>b</sup> | 48°C                                               |            |
| 18SF                                                                        | GTAGTCATATGCTTGTCTC     | Amoebozoa                                                                                                            | 17-35 <sup>b</sup>     | 48°C                                               | This study |
| 18SR                                                                        | CGRARACCTTGTTACGAC      | Amoebozoa                                                                                                            | 2256-2273 <sup>b</sup> | 48°C                                               |            |
| S12.2                                                                       | GATYAGATACCGTCGTAGTC    | Amoebozoa                                                                                                            | 1220-1239 <sup>b</sup> | 48°C                                               | (5)        |
| Aas79F                                                                      | ACACTTCGGTGTGTCTGG      | ' <i>Cand. Amoebophilus asiaticus</i> '                                                                              | 79-98 <sup>a</sup>     | 50°C                                               | This study |
| Aas1467R                                                                    | GTCGCTGATCTAACCTA       | ' <i>Cand. Amoebophilus asiaticus</i> '                                                                              | 1467-1484 <sup>a</sup> | 50°C                                               |            |
| <b>16S and 18S rRNA targeted oligonucleotides used for FISH<sup>d</sup></b> |                         |                                                                                                                      |                        |                                                    |            |
| EUB338-I <sup>e</sup>                                                       | GCTGCCTCCCCTAGGAGT      | Most <i>Bacteria</i>                                                                                                 | 338-355 <sup>a</sup>   | 0-70%                                              | (1)        |
| EUB338-II <sup>e</sup>                                                      | GCAGCCACCCGTAGGTGT      | Bacteria not covered by probe EUB338,<br>e.g., many <i>Planctomycetes</i>                                            | 338-355 <sup>a</sup>   | 0-70%                                              | (4)        |
| EUB338-III <sup>e</sup>                                                     | GCTGCCACCCGTAGGTGT      | Bacteria not covered by probe EUB338,<br>e.g., many <i>Verrucomicrobia</i>                                           | 338-355 <sup>a</sup>   | 0-70%                                              |            |
| EUK516                                                                      | ACCAGACTTGCCCTCC        | Most Eukarya                                                                                                         | 502-517 <sup>a</sup>   | 0-70%                                              | (1)        |
| Bn9-658                                                                     | TCCGTTTTCTCCGCCTAC      | Subgroup of the <i>Parachlamydiaceae</i>                                                                             | 658-675 <sup>a</sup>   | 10%                                                | (2)        |
| Aph1180                                                                     | CTGACCTCATCCCCTCCT      | ' <i>Cand. Amoebophilus asiaticus</i> '                                                                              | 1180-1197 <sup>a</sup> | 20%                                                | (8)        |
| Proca438                                                                    | CGATTTCTCCCRGACAA       | ' <i>Cand. Procabacter acanthamoebae</i> '                                                                           | 438-455 <sup>a</sup>   | 20%                                                | (7)        |
| CC23a                                                                       | TTC CAC TTT CCT CTC TCG | <i>Caedibacter caryophilus</i> and other<br><i>Caedibacter</i> -related endosymbionts of<br><i>Acanthamoeba</i> spp. | 658-675 <sup>a</sup>   | 20%                                                | (13)       |

<sup>a</sup> 16S rRNA position, *E. coli* numbering according to (3)

<sup>b</sup> 18S rRNA position in *A. castellanii* Neff ATCC50373 (U07416)

<sup>c</sup> Primer sequences contain restriction enzyme site for BamH1 and Sall

<sup>d</sup> Further details on the probes used for FISH are available at probeBase ([www.microbial-ecology.net/probebase](http://www.microbial-ecology.net/probebase); 10)

<sup>e</sup> EUB338, EUB338-II, and EUB338-III were applied simultaneously to target most *Bacteria*

## References

1. **Amann, R., B. J. Binder, R. J. Olson, S. W. Chisholm, R. Devereux, and D. A. Stahl.** 1990. Combination of 16S rRNA-targeted oligonucleotide probes with flow cytometry for analyzing mixed microbial populations. *Appl. Environ. Microbiol.* **56**:1919-1925.
2. **Amann, R., N. Springer, W. Schonhuber, W. Ludwig, E. N. Schmid, K. D. Muller, and R. Michel.** 1997. Obligate intracellular bacterial parasites of acanthamoebae related to *Chlamydia* spp. *Appl. Environ. Microbiol.* **63**:115-21.
3. **Brosius, J., T. J. Dull, D. D. Sleeter, and H. F. Noller.** 1981. Gene organization and primary structure of a ribosomal RNA operon from *Escherichia coli*. *J. Mol. Biol.* **148**:107-27.
4. **Daims, H., A. Bruhl, R. Amann, K. H. Schleifer, and M. Wagner.** 1999. The domain-specific probe EUB338 is insufficient for the detection of all Bacteria: development and evaluation of a more comprehensive probe set. *Syst. Appl. Microbiol.* **22**:434-44.
5. **Fahrni, J. F., I. Bolivar, C. Berney, E. Nasonova, A. Smirnov, and J. Pawlowski.** 2003. Phylogeny of lobose amoebae based on actin and small-subunit ribosomal RNA genes. *Mol. Biol. Evol.* **20**:1881-6.
6. **Gast, R. J., P. A. Fuerst, and T. J. Byers.** 1994. Discovery of group I introns in the nuclear small subunit ribosomal RNA genes of *Acanthamoeba*. *Nucleic Acids Res.* **22**:592-596.
7. **Horn, M., T. R. Fritsche, T. Linner, R. K. Gautom, M. D. Harzenetter, and M. Wagner.** 2002. Obligate bacterial endosymbionts of *Acanthamoeba* spp. related to the *beta-Proteobacteria*: proposal of '*Candidatus Procabacter acanthamoebae*' gen. nov., sp. nov. *Int. J. Syst. Evol. Microbiol.* **52**:599-605.
8. **Horn, M., M. D. Harzenetter, T. Linner, E. N. Schmid, K. D. Muller, R. Michel, and M. Wagner.** 2001. Members of the *Cytophaga-Flavobacterium-Bacteroides* phylum as intracellular bacteria of acanthamoebae: proposal of '*Candidatus Amoebophilus asiaticus*'. *Environ. Microbiol.* **3**:440-9.
9. **Juretschko, S., G. Timmermann, M. Schmid, K. H. Schleifer, A. Pommerening-Roser, H. P. Koops, and M. Wagner.** 1998. Combined molecular and conventional analyses of nitrifying bacterium diversity in activated sludge: *Nitrosococcus mobilis* and *Nitrospira*-like bacteria as dominant populations. *Appl. Environ. Microbiol.* **64**:3042-51.
10. **Loy, A., F. Maixner, M. Wagner, and M. Horn.** 2007. probeBase: an online resource for rRNA-targeted oligonucleotide probes: new features 2007. *Nucleic Acids Res* **35**:D800-4.
11. **Loy, A., C. Schulz, S. Lucker, A. Schopfer-Wendels, K. Stoecker, C. Baranyi, A. Lehner, and M. Wagner.** 2005. 16S rRNA gene-based oligonucleotide microarray for environmental monitoring of the betaproteobacterial order "*Rhodocyclales*". *Appl. Environ. Microbiol.* **71**:1373-86.
12. **Pudjiatmoko, H. F., Y. Ochiai, T. Yamaguchi, and K. Hirai.** 1997. Phylogenetic analysis of the genus *Chlamydia* based on 16S rRNA gene sequences. *Int. J. Syst. Bact.* **45**:425-431.
13. **Springer, N., W. Ludwig, R. Amann, H. J. Schmidt, H. D. Gortz, and K. H. Schleifer.** 1993. Occurrence of fragmented 16S rRNA in an obligate bacterial endosymbiont of *Paramecium caudatum*. *Proc. Natl. Acad. Sci. U S A* **90**:9892-5.
